# Supplementary material
Source: Springer Nature journal article supplement (https://www.springermedizin.de/resource/supplementary/12947_2012_429_MOESM3_ESM.pdf/9555728)

20090602-09:28:48

Bild = 38

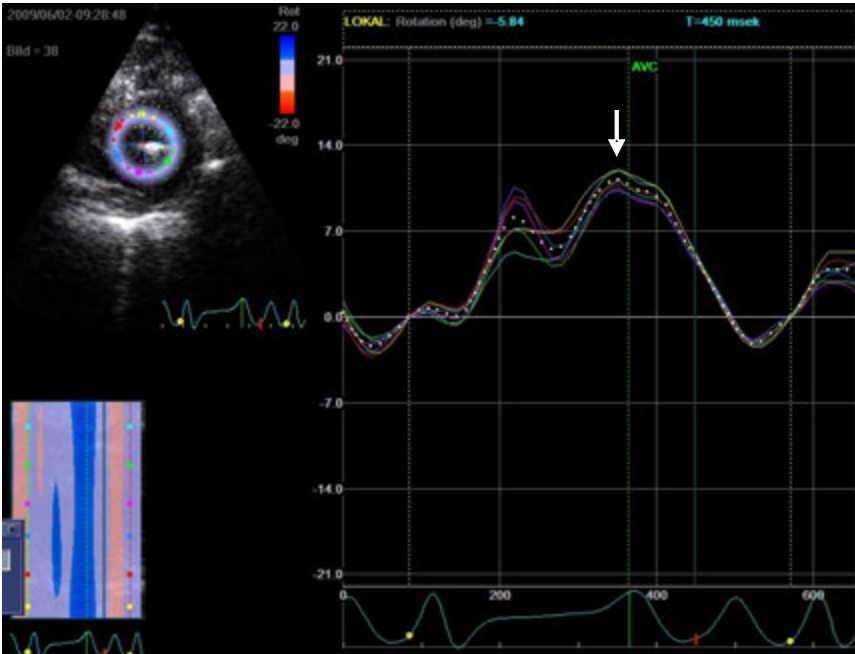

20090602-09:28:48

Bild = 38

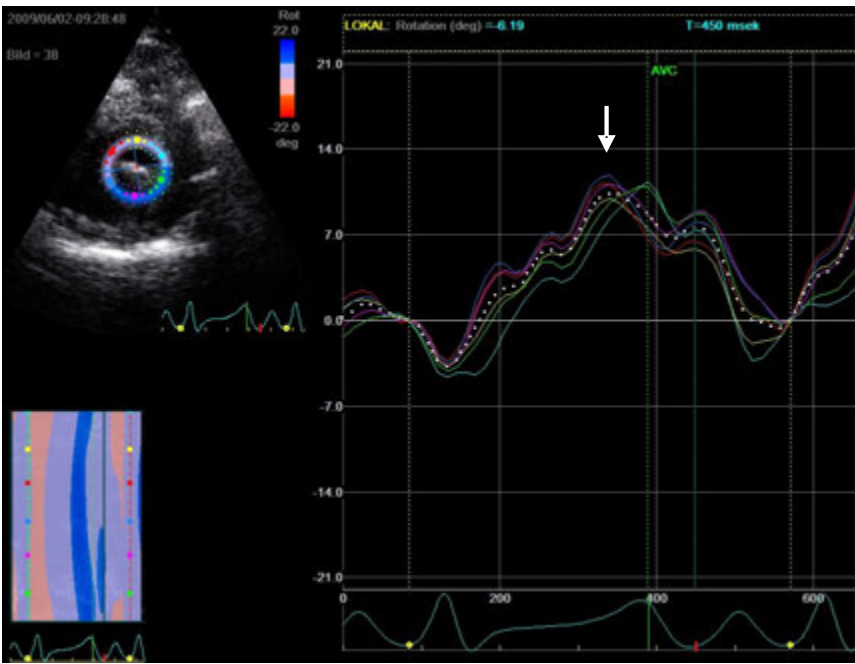

Supplement: MOESM3 [file 9555728]
